# Supplementary material for: Ontogenetic scaling patterns and functional anatomy of the pelvic limb musculature in emus (Dromaius novaehollandiae)
Source: PeerJ. 2014 Dec 23;2:e716. doi: 10.7717/peerj.716 (PMC4277488; doi:10.7717/peerj.716)
Supplement: Supplemental Information 1 [file peerj-02-716-s001.xlsx]

## Sheet: RawData
Muscle	Limb	BodyMass	TotLength(mm)	Bellylength(mm)	TenLength(mm)	MuscleMass(g)	Tenmass(g)	FasLength(mm)	Pennation Angle	PCSA (cm^3)	TCSA (cm^3)
AMB	R	3600	7.7	5.3	2.4	5.76	0.42	5.3	28.3333	0.902449	0.15625
CFP	R	3600	11	8	3	13.16	0.19	4	19	2.93468	0.0565476
EDL	R	3600	33	10.1	22.9	6.2	1.2	2.38	21	2.29435	0.0467873
FCLA	R	3600	3.1	3.1	0	4.27	0	3.1	0	1.29945	#DIV/0!
FCLP	R	3600	13.6	13.6	0	19.91	0	10.8333	0	1.73382	#DIV/0!
FCM	R	3600	12.3	7.3	5	4.88	0.61	3.02	0	1.52443	0.108929
FDL	R	3600	36	13	23	8.78	2	2.7	22	2.8444	0.0776398
FHL	R	3600	29.5	8.5	21	4.53	0.58	0.966667	38.3333	3.46786	0.0246599
FL	R	3600	26	14	12	30.4	1.57	2.325	26.25	11.0631	0.116815
FMTIM	R	3600	7.6	7.6	0	5.51	0	2.2	31.6667	2.011	#DIV/0!
FMTL	R	3600	10.1	10.1	0	38.25	0	8	0	4.51061	#DIV/0!
FMTM	R	3600	9.5	6.9	2.6	10.45	0.46	4.55	0	2.1667	0.157967
FPD II	R	3600	33	11	22	0.68	0.41	1.6	20	0.376764	0.0166396
FPD III	R	3600	36.3	14.1	22.2	8.92	1.82	1.075	32.5	6.60206	0.0731982
FPD IV	R	3600	34	8	26	5.4	1.24	1.98	36	2.08152	0.0425824
FPPD II	R	3600	25.5	14	11.5	1.04	0.1	2.53333	13.3333	0.37685	0.00776398
FPPD III	R	3600	40.5	13	27.5	4.98	0.74	1.43333	26.6667	2.92911	0.024026
GIM	R	3600	11.5	11.5	0	3.05	0	4.96	26.4	0.519614	#DIV/0!
GL	R	3600	16.5	14.2	2.3	34.1	0.54	3.44	45	6.61264	0.209627
GM	R	3600	25.5	13.5	12	48.46	2.61	5.5	26.25	7.45497	0.194196
IC	R	3600	13	13	0	29.73	0	11.92	0	2.35295	#DIV/0!
IFE	R	3600	3.6	3.3	0.3	2.26	0.08	3.3	0	0.646083	0.238095
IFI	R	3600	2.9	2.6	0.3	0.25	0.01	2.5	5	0.0939806	0.0297619
ILFB	R	3600	14.7	12.4	2.3	36.41	0.26	11.08	0	3.1001	0.100932
ILPO	R	3600	12.2	11.1	1.1	55.97	0.73	9.475	0	5.57276	0.592532
ISF	R	3600	2.6	2.6	0	0.4	0	2.6	15	0.140192	#DIV/0!
ITC	R	3600	6.5	6	0.5	21.88	1.1	2.2	41	7.08107	1.96429
ITCr	R	3600	5.2	3.9	1.3	5.24	0.16	1.32	32	3.17594	0.10989
ITM	R	3600	4	1.8	2.2	0.42	0.01	1.03333	16.6667	0.367336	0.00405844
OMII	R	3600	8.2	6.9	1.3	5.88	0.34	1.78	42.6	2.29396	0.233516
OMIP	R	3600	10.9	7.4	3.5	8.49	1.36	0.866667	36.6667	7.41295	0.346939
PIFLM	R	3600	12.5	10.5	2	8.85	0.16	2.46	12.2	3.31728	0.0714286
POP	R	3600	3.2	0	0	1.38		3.2	0	0.40684	#DIV/0!
TC	R	3600	20.5	15.1	5.4	22.77	1.85	1.38	34.1667	12.8795	0.305886
AMB	R	3920	4.5	4.5		5.13		4.025	0	1.20239	#DIV/0!
CFP	R	3920	8.5	6.7	1.8	13.62	0.14	6.6	0	1.94683	0.0694444
EDL	R	3920	38.7	10.8	27.9	3.96	0.99	1.725	16.25	2.07919	0.031682
FCLA	R	3920	4	4		3.77		3.775	0	0.942147	#DIV/0!
FCLP	R	3920	10.5	10.5		16.28		17.725	0	0.866487	#DIV/0!
FCM	R	3920	10.5	6	4.5	3.43	0.16	1.4	22.5	2.13538	0.031746
FDL	R	3920	40	8.5	31.5	4.91	1.86	2.075	23.75	2.04327	0.0527211
FHL	R	3920	28.5	12	16.5	6.58	0.51	2.125	32.5	2.46371	0.0275974
FL	R	3920	27.9	15.7	12.2	27.29	0.5	2.44	35	8.64316	0.0365925
FMTIM	R	3920	9.1	9.1		5.52		2.4	22.5	2.00464	#DIV/0!
FMTL	R	3920	9.5	8.3	1.2	32.92	0.9	4.4	16	6.78489	0.669643
FMTM	R	3920	7.5	7.5		10.91		1.975	33.75	4.33309	#DIV/0!
FPD II	R	3920	36	7	29	2.29	0.82	1.425	12.5	1.48012	0.0252463
FPD III	R	3920	42	10	32	4.22	0.72	1.475	21.25	2.51556	0.0200893
FPD IV	R	3920	38.5	10	28.5	5.56	1.06	2.15	46.25	1.68706	0.033208
FPPD II	R	3920	38	13.5	24.5	3.6	1.13	4.1	42.5	0.610722	0.0411808
FPPD III	R	3920	38.2	13.7	24.5	8.39	1.6	1.3	42.5	4.48894	0.058309
GIM	R	3920	29.2	18.7	10.5	8.34	0.12	4.325	15	1.75719	0.0102041
GL	R	3920	18.4	14	4.4	27.63	0.86	3.4	36.25	6.18259	0.174513
GM	R	3920	26.6	14.8	11.8	45.74	3.19	4.04	23	9.83184	0.241374
IC	R	3920	11.4	11.4		29.45		9.525	0	2.91685	#DIV/0!
IFE	R	3920	5.5	3	2.5	2.47	0.18	3	0	0.77673	0.0642857
IFI	R	3920	3.8	3.8		1.13		3.1	0	0.343883	#DIV/0!
ILFB	R	3920	13.1	9.7	3.4	36.43	0.29	10.1	0	3.40276	0.0761555
ILPO	R	3920	13.75	13.38	0.74	54.81	0.45	8.93	0	5.79032	0.542954
ISF	R	3920	1.2	1.2		0.35		1.15	0	0.287121	#DIV/0!
ITC	R	3920	6.7	5	1.7	23.56	0.48	1.575	37.5	11.1958	0.252101
ITCr	R	3920	4.3	2.2	2.1	5.17	0.32	1.2	36.25	3.27777	0.136054
ITM	R	3920	4.5	2.4	2.1	0.78	0.7	0.2	0	3.67925	0.297619
OMII	R	3920	9.4	6.1	3.3	5.32	0.24	3.125	0	1.60604	0.0649351
OMIP	R	3920	9.7	6.3	3.4	10.25	0.27	1.925	43.75	3.62864	0.0709034
PIFLM	R	3920	11.3	9.1	2.2	9.19	0.24	7.725	0	1.12231	0.0974026
POP	R	3920	3.5	3.5		1.11		3.4	0	0.307991	#DIV/0!
TC	R	3920	19.9	14.5	5.4	18.24	0.92	1.575	36.25	8.81075	0.152116
AMB	R	3950	5	5	0	3.2	0	4.33	15	0.673442	#DIV/0!
CFP	R	3950	7.5	7.5	0	7.95	0.35	2.725	0	2.75229	#DIV/0!
EDL	R	3950	32	10.7	21.3	3.43	0.97	1.16667	20	2.60632	0.0406606
FCLP	R	3950	10.5	10.5	0	12.35	0	9.925	0	1.1739	#DIV/0!
FCM	R	3950	9.4	4.9	4.5	3.7	0.3	2.23	6.66	1.55471	0.0595238
FDL	R	3950	31.3	11.8	19.5	5.64	1	1	26	4.78226	0.0457875
FHL	R	3950	25.7	7.5	18.2	2.36	0.28	0.966667	38.3333	1.80666	0.0137363
FL	R	3950	23.1	12.9	10.2	26.25	0.86	2.95	24.75	7.62352	0.0752801
FMTIM	R	3950	7.7	7.7	0	6.7	0	2.895	23.165	2.00731	#DIV/0!
FMTL	R	3950	7.4	7.4	0	19.2	0	6.35	0	2.85247	#DIV/0!
FMTM	R	3950	8.9	6.7	2.2	6.66	0.75	3.18	0	1.97579	0.304383
FPD II	R	3950	31.2	4.2	27	0.51	0.16	3.2	20	0.141286	0.00529101
FPD III	R	3950	31	11.2	19.8	6.32	1.35	0.775	32.75	6.47032	0.0608766
FPD IV	R	3950	31.7	9.7	22	4.1	0.86	0.925	31	3.58428	0.0349026
FPPD II	R	3950	32.9	6.8	26.1	1.6	0.6	4.2	0	0.359389	0.0205255
FPPD III	R	3950	34.7	11.9	22.8	3.71	0.56	0.625	22.5	5.17373	0.0219298
GIM	R	3950	26.1	10.2	15.9	11.24	3.46	4.45	12.5	2.32639	0.194295
GL	R	3950	26.4	13.8	12.6	19.35	2.89	2.125	28.75	7.53148	0.20479
GM	R	3950	29.6	14.2	15.4	30.01	2.86	6.93333	20	3.83711	0.165816
IC	R	3950	12.1	12.1	0	18	0	12	0	1.41509	#DIV/0!
IFE	R	3950	3.5	2	1.5	1.1	0.1	2	0	0.518868	0.0595238
IFI	R	3950	1.2	1.2	0	0.4	0	1.2	0	0.314465	#DIV/0!
ILFB	R	3950	11.5	9.7	1.8	21.8	0.5	9.7	0	2.12021	0.248016
ILPO	R	3950	13.4	13.4	0	28.7	0	9.41	0	2.87731	#DIV/0!
ISF	R	3950	1.3	1.3	0	0.4	0	1.5	0	0.251572	#DIV/0!
ITC	R	3950	6.2	5	1.2	12.2	0.2	1.68	39	5.32411	0.14881
ITCr	R	3950	6.3	4.2	2.1	1.6	0.1	1.2	11.66	1.2319	0.042517
ITM	R	3950	3.8	3	0.8	1.2	0.1	1.15	35	0.806384	0.111607
OMII	R	3950	9	7.2	1.8	4.35	0.35	1.8	33	1.91206	0.173611
OMIP	R	3950	9.5	6.6	2.9	6.8	0.4	1.65	31	3.33261	0.123153
PIFLM	R	3950	8.4	8.4	0	7	0.2	3.365	22.5	1.8131	#DIV/0!
POP	R	3950	1.1	1.1	0	0.2		0.9	0	0.209644	#DIV/0!
TC	R	3950	17.8	14.4	3.4	13.08	0.73	1.78	32.4	5.8532	0.191702
AMB	R	4100	9.2	9.2	0	5.93	0	3.4	31.6667	1.40042	#DIV/0!
CFP	R	4100	7.1	5.9	1.2	10.3	0.12	3.13	26.6667	2.77425	0.0892857
EDL	R	4100	33	9	24	3.34	0.8	1.66667	23.3333	1.73595	0.0297619
FCLA	R	4100	4.5	4.5	0	3.44	0	4.55	0	0.713249	#DIV/0!
FCLP	R	4100	12	12	0	13.3	0	11.575	0	1.08399	#DIV/0!
FCM	R	4100	8.2	8.2	0	4.2	0	2.2	26.6667	1.60946	#DIV/0!
FDL	R	4100	34.5	10.5	24	5.98	1.25	1.525	17.5	3.52813	0.046503
FHL	R	4100	27.5	9	18.5	2.81	0.72	1.78	22.5	1.37593	0.034749
FL	R	4100	26.1	13.4	12.7	19.14	0.74	3.46667	25	4.72063	0.0520247
FMTIM	R	4100	6.6	6.4	0.2	3.27	0	6.03333	0	0.51131	0
FMTL	R	4100	9	9	0	25	0.51	5.36	9.375	4.3414	#DIV/0!
FMTM	R	4100	7.4	7.4	0	5.9	0	2.25	13	2.41039	#DIV/0!
FPD II	R	4100	28.8	6.4	22.4	1.04	0.2	5.54	15	0.171065	0.00797194
FPD III	R	4100	33.5	13	20.5	7.05	1.22	1.08333	15	5.93014	0.0531359
FPD IV	R	4100	32	7.5	24.5	5.04	1.2	1.85	21.25	2.39537	0.0437318
FPPD II	R	4100	38	12.5	25.5	2.5	1.03	1.125	7.5	2.0785	0.0360644
FPPD III	R	4100	32.5	5	27.5	2.89	0.46	3.36667	15	0.782232	0.0149351
GIM	R	4100	11.2	8.2	3	3.47	0.14	6.64	0	0.49301	0.0416667
GL	R	4100	18.1	11.9	6.2	24.48	0.5	3.48	20	6.23609	0.0720046
GM	R	4100	23.5	14.5	9	34.4	2.1	4.86	17.5	6.36848	0.208333
IC	R	4100	11.5	11.5	0	20	0	11.5	0	1.64069	#DIV/0!
IFE	R	4100	3.4	3.1	0.3	2.16	0.1	3.1	0	0.657334	0.297619
IFI	R	4100	4.6	4.3	3	0.38	0.01	4.43333	5	0.0805548	0.00297619
ILFB	R	4100	12	8.5	3.5	24	0.16	7.6	0	2.97915	0.0408163
ILPO	R	4100	18.5	16.5	2	33.5	0.5	12.54	5	2.51065	0.223214
ISF	R	4100	1.1	1.1	0	0.32	0	1.1	0	0.274443	#DIV/0!
ITC	R	4100	5.9	4.7	1.2	15.93	0.33	1.8	26	7.50408	0.245536
ITCr	R	4100	6.2	4	2.2	3.16	0.16	1.15	40	1.98581	0.0649351
ITM	R	4100	2.5	2.5	0	1.01		2.16667	5	0.438094	#DIV/0!
OMII	R	4100	9.5	7.9	1.6	4.2	0.13	0.366667	38.3333	8.47653	0.0725446
OMIP	R	4100	10	7.4	2.6	6.05	0.15	1.3	31.3333	3.75011	0.051511
PIFLM	R	4100	11	7.6	3.4	7.5	0.43	5.6	5	1.25867	0.11292
POP	R	4100	2.7	2.7	0	0.91		0.5	32.5	1.44809	#DIV/0!
TC	R	4100	18.5	13.5	5	14.5	0.72	1.44	18.75	8.99534	0.128571
AMB	R	6000	6.9	6.9	0	7.48		3.325	13.75	2.06147	#DIV/0!
CFP	R	6000	8.9	8.9	0	14.41	0	3.12	49.2857	2.84212	#DIV/0!
EDL	R	6000	3.2	1.07	2.13	3.43	0.97	1.1	20	2.76428	0.406606
FCLA	R	6000	3.9	3.9	0	4.21		3.32	0	1.19629	#DIV/0!
FCLP	R	6000	11.9	11.9	0	21.92		11.16	0	1.85298	#DIV/0!
FCM	R	6000	8.3	4.1	4.2	3.76	0.22	1.325	20	2.51566	0.0467687
FDL	R	6000	38.5	12.5	26	8.69	1.8	1.94	11.6	4.13952	0.0618132
FL	R	6000	27.4	13.2	14.2	34.25	1.42	5.28	23.6	5.60774	0.0892857
FMTIM	R	6000	4.8	4.8	0	2.55		2.875	0	0.836751	#DIV/0!
FMTL	R	6000	8.5	8.5	0	42.13		5.6	5	7.07036	#DIV/0!
FMTM	R	6000	8.1	7	1.1	9.32	0.2	4.6	11.6	1.87236	0.162338
FPD II	R	6000	32.5	6	26.5	2.3	0.67	2.025	20	1.00689	0.0225741
FPD III	R	6000	36	14	22	10.26	1.89	1.06667	25	8.2241	0.0767045
FPD IV	R	6000	36.5	10.2	26.3	5.2	1	1.6	27.3333	2.72372	0.0339489
FPPD II	R	6000	14	7.5	6.5	1.45	0.1	1.5	34.3333	0.753061	0.0137363
FPPD III	R	6000	42	11.5	30.5	5.34	0.814	0.85	21	5.5331	0.023829
GIM	R	6000	11.2	11.2	0	4.06		6.9	0	0.5551	#DIV/0!
GL	R	6000	13.8	11.2	1.5	32.94	0.47	4.92	28.4	5.55599	0.279762
GM	R	6000	27	14	13	55.86	3.75	5.5	16.4	9.19164	0.257555
IC	R	6000	10.8	10.8	0	31.3	0	10.8	0	2.7341	#DIV/0!
IFE	R	6000	3.5	2.8	0.7	1.95	0.075	2.8	0	0.657008	0.0956633
IFI	R	6000	3.7	3.7	0	0.526		3.25	0	0.152685	#DIV/0!
ILFB	R	6000	13.4	10.7	2.7	42.06	0.26	9.68	0	4.0991	0.0859788
ILPO	R	6000	18	16	2	60.8	1.47	8.95714	0	6.40366	0.65625
ISF	R	6000	2.1	2.1	0	1.21		1.725	0	0.661745	#DIV/0!
ITC	R	6000	5.8	4.2	1.6	22.23	0.383	1.64	33	10.7246	0.213728
ITCr	R	6000	3.8	3.8	0	4.47		1.75	35	1.97391	#DIV/0!
ITM	R	6000	1.3	1.3	0	0.385		0.8	26	0.408061	#DIV/0!
OMII	R	6000	8.8	6.2	2.6	5.4	0.33	1.075	35	3.8819	0.113324
OMIP	R	6000	9.3	6.2	3.1	7.84	0.58	1.1	37.5	5.33438	0.167051
PIFLM	R	6000	10.5	9	1.5	7.92	0.02	5	21.1429	1.39375	0.0119048
POP	R	6000	2.7	2.7	0	0.78		3	10	0.241557	#DIV/0!
TC	R	6000	17	8.2	8.8	21.04	1.57	3.6	25	4.99704	0.159294
AMB	R	17000	14.3	10.5	3.8	28	2	3.85	16.75	6.56996	0.469925
CFP	R	17000	18	13.5	4.5	62	2	5	0	11.6981	0.396825
EDL	R	17000	66.5	20.5	46	31.99	10.25	2.4	12.5	12.2766	0.198952
FCLA	L	17000	7.4	7.4	0	29.8	0	6.86	0	4.09814	#DIV/0!
FCLP	L	17000	22.3	22.3	0	121.4	0	22.1	0	5.18228	#DIV/0!
FCM	L	17000	23.4	12.4	11	41.4	1.6	3.5	21.25	10.4003	0.12987
FHL	L	17000	67	11.4	55.6	21.91	7.36	1.9	41.5	8.14778	0.118191
FL	L	17000	50.4	27.2	23.2	200.64	6.54	7.46667	0	25.3504	0.251693
FMTIM	R	17000	15.5	12	3.5	22	2	11.25	0	1.84486	0.510204
FMTL	R	17000	15.5	13.5	2	91	2	12.725	0	6.74649	0.892857
FMTM	R	17000	7.5	5	2.5	10	1	1.86	33.3	4.23923	0.357143
FPD II	L	17000	63.5	10.5	53	12.7	3.7	7.2	15	1.60735	0.0623315
FPD III	L	17000	60.4	20.2	40.2	63.86	13.98	1.2	23.75	45.9527	0.310501
FPD IV	L	17000	53.8	13.1	50.7	35.66	7.9	3.02	17.5	10.624	0.139124
FPPD II	L	17000	69.3	6.8	61.5	5.36	2.36	6.825	24	0.676841	0.0342625
FPPD III	L	17000	72	20.5	51.5	37.08	5.38	3.8	22.25	8.52012	0.0932732
GIM	R	17000	27.9	10.4	17.5	25.23	2.33	7.325	15	3.13868	0.118878
GL	L	17000	43.8	25.6	18.2	279.04	25.54	9.46667	10.8333	27.312	1.25294
GM	L	17000	46	25.5	20.5	204.34	25.54	6.66667	21.1667	26.9652	1.11237
IC	R	17000	28.5	28.5	0	223	0	17.2	0	12.2312	#DIV/0!
IFE	R	17000	8.7	4.5	4.2	13	2	4.5	0	2.72537	0.42517
IFI	L	17000	9.5	8.4	1.1	3.9	0.4	6.7	0	0.549141	0.324675
ILFB	R	17000	22.4	19.4	3	249	2	13.875	0	16.9301	0.595238
ILPO	R	17000	25	23	2	456	7.5	18.2	0	23.6367	3.34821
ITC	R	17000	11.2	8.5	2.7	132	3	3.9	27.6	28.2968	0.992063
ITCr	R	17000	13	10.8	2.2	23	1	2.3	18.3	8.95684	0.405844
ITM	R	17000	7.4	3.7	3.7	4	1	3.7	0	1.01989	0.241313
OMII	R	17000	20.1	14.3	5.8	36	3	5.1	20	6.25766	0.461823
OMIP	R	17000	19.5	13.5	6	58	2	3.45	38.75	12.369	0.297619
PIFLM	R	17000	21.5	16	5.5	57	2	10.3	18	4.96522	0.324675
TC	R	17000	35.3	24.9	10.4	103.8	6.48	2.9	31.5714	28.7691	0.556319
AMB	R	18000	15.1	14.1	1	28.4	0.7	5.925	0	4.52193	0.625
CFP	R	18000	17.9	17.9		58.2		12.24	0	4.48576	#DIV/0!
EDL	R	18000	70.9	22.2	48.7	34.5	7.5	3.8	43	6.26408	0.137504
FCLA	R	18000	6.5	6.5		15.8		5.95	0	2.50515	#DIV/0!
FCLP	R	18000	21.9	21.9		107.4		20.125	0	5.03457	#DIV/0!
FCM	R	18000	17.1	11.9	5.2	39.2	1.1	5.4	18.75	6.48492	0.188874
FDL	R	18000	71.5	25.1	46.4	59.6	12.9	3.55	35	12.9741	0.24823
FHL	R	18000	50.5	11.9	38.6	30.9	4.6	2.35	41.25	9.32631	0.106403
FL	R	18000	52.4	27.4	25	213.9	5.9	4.9	31	35.3	0.210714
FMTIM	R	18000	14.8	14.8		17.8		7.45	0	2.25402	#DIV/0!
FMTL	R	18000	16.5	14	2.5	199	1.35	10.5	5	17.8116	0.482143
FMTM	R	18000	13	10.3	2.7	53.1	1.16	4.86	19	9.74591	0.383598
FPD II	R	18000	61	13	48	11.65	2.45	3.325	28.75	2.89796	0.0455729
FPD III	R	18000	66.2	24.7	41.5	63	12.9	0.8	37	59.3326	0.277539
FPD IV	R	18000	67.5	15.5	52	37.5	7.9	1.925	40	14.0782	0.135646
FPPD II	R	18000	65.5	6.5	59	5.4	2	3.25	27.5	1.39038	0.0302663
FPPD III	R	18000	68.3	16.2	52.1	32.2	5.5	1.775	41.25	12.867	0.0942556
GIM	R	18000	27	18.5	8.5	41.47	2.37	10.25	0	3.81684	0.24895
GL	R	18000	39.5	27	12.5	214.92	2.2	6.86	31	25.3345	0.157143
GM	R	18000	44.4	30.7	13.7	312.97	11.77	8.975	31.25	28.1244	0.767075
IC	R	18000	18.8	18.8		182.3		17.2	0	9.9989	#DIV/0!
IFE	R	18000	10.2	10.2		15.4		10.2	0	1.42434	#DIV/0!
IFI	R	18000	6.2	6.2		2.4		5.52	0	0.410172	#DIV/0!
ILFB	R	18000	25.5	19.1	6.4	219	1.2	14.475	0	14.2731	0.167411
ILPO	R	18000	29.7	25.35	8.7	310.4		15.31	0	19.1267	0
ISF	R	18000	6	6		2.8		4.1	0	0.644271	#DIV/0!
ITC	R	18000	15.2	10.8	4.4	111.9	1.9	3.28	35	26.3642	0.385552
ITCr	R	18000	12.4	5.2	7.2	19.1	0.9	2.025	45	6.29198	0.111607
ITM	R	18000	2.7	2.7		9		2.25	23.75	3.45401	#DIV/0!
OMII	R	18000	25.3	16.6	8.7	30.5	1.3	2.7	35	8.72961	0.133415
OMIP	R	18000	20.7	13	7.7	47.8	1.4	4.175	22.5	9.97886	0.162338
PIFLM	R	18000	18.3	14.5	3.8	55.2	1.1	5.975	11.25	8.54809	0.258459
POP	R	18000	4.5	4.5		8.1		4.25	0	1.798	#DIV/0!
TC	R	18000	38.2	25	13.2	125.2	5.1	2.65	37.5	35.3606	0.344968
AMB	R	19300	14.4	8.4	6	28.05	0.88	4.8	0	5.51297	0.130952
CFP	R	19300	20	20		81.81		8.175	0	9.44089	#DIV/0!
EDL	R	19300	74.3	22.4	51.9	29.28	8.35	4.95	27.5	4.94981	0.143648
FCLA	R	19300	7.5	7.5		11.21		3.625	0	2.91737	#DIV/0!
FCLP	R	19300	21.3	21.3		111.08		17.45	0	6.0053	#DIV/0!
FDL	R	19300	78	28.6	49.4	64.05	13.1	4	26.25	13.5483	0.23677
FHL	R	19300	55.5	15	40.5	25.49	5.15	3.7	35	5.32386	0.113536
FL	R	19300	52.8	27.8	25	215.21	9.75	5.15	12.5	38.4885	0.348214
FMTIM	R	19300	17.5	17.5		39.64		4.625	26.25	7.25182	#DIV/0!
FMTL	R	19300	20	18	2	248.39	1.1	10.48	14	21.6956	0.491071
FMTM	R	19300	15.5	13.5	2	38	0.24	3.325	26.25	9.66979	0.107143
FPD II	R	19300	56.5	44.1	12.4	11.07	2.08	2.025	12.5	5.03499	0.14977
FPD III	R	19300	72	16.1	55.9	75	19.22	1.68	38.75	32.8455	0.30699
FPD IV	R	19300	71.5	18.1	53.4	36.26	7.84	1.175	32.5	24.5535	0.131086
FPPD II	R	19300	70.5	8	62.5	5.36	1.76	3.7	11.25	1.34039	0.0251429
FPPD III	R	19300	77.9	18	59.9	31.56	7.09	1.175	13.75	24.6131	0.105682
GIM	R	19300	32.6	25.2	7.4	58.48	3.41	11.45	0	4.81832	0.411438
GL	R	19300	34.2	27.9	6.3	201.93	3.14	6.525	12.5	28.5034	0.445011
GM	R	19300	44.6	29.1	15.5	296.43	14.99	7.25	13.75	37.4671	0.863479
IC	R	19300	16.5	16.5		196.86		15.75	0	11.7916	#DIV/0!
IFE	R	19300	15.5	11.5	4	16.49	0.91	11.5	0	1.35275	0.203125
IFI	R	19300	7	7		3.61		4.25	0	0.801332	#DIV/0!
ILFB	R	19300	24.5	19.5	5	282.22	0.82	17.75	0	14.9997	0.146429
ILPO	R	19300	22.75	21.75	2	355.07	0.61	11.11	0	30.1505	0.272321
ISF	R	19300	3.7	3.7		1.4		0.625	47.5	1.42766	#DIV/0!
ITC	R	19300	16.5	13	3.5	149.64	2.04	4.3	26	29.5076	0.520408
ITCr	R	19300	13.5	11.1	2.4	23.22	0.72	2.225	36.25	7.93964	0.267857
OMII	R	19300	21	16.5	4.5	68.32	0.89	1.675	27.5	34.1316	0.176587
OMIP	R	19300	20.5	14.7	5.8	39.1	1.38	1.35	40	20.9311	0.212438
PIFLM	R	19300	20.5	17.8	2.7	62.07	0.73	10.125	0	5.78337	0.241402
POP	R	19300	6	6		9		5.075	0	1.67302	#DIV/0!
TC	R	19300	38.7	29.5	9.2	119.94	7.3	4.72	26	21.5465	0.708463
AMB	R	20000	11.2	8.2	3	34.8	0.34	7.4	0	4.43651	0.10119
CFP	R	20000	17.9	14.4	3.5	66.87	0.98	3.2	27	17.5653	0.25
EDL	R	20000	71.5	20.5	51	33.37	6.69	2.98	13	10.2934	0.117122
FCLA	R	20000	6.5	6.5		17.3		5.375	0	3.03642	#DIV/0!
FCLP	R	20000	23.5	23.5		134.46		17.08	0	7.42676	#DIV/0!
FCM	R	20000	10.2	10.2		36.99		2.04	42	12.7122	#DIV/0!
FDL	R	20000	71.5	12.7	58.8	35.95	13.63	1.125	32.5	25.4255	0.206967
FHL	R	20000	49.5	21.5	28	52.74	3.11	2.75	37.5	14.3538	0.0991709
FL	R	20000	50	27	23	238	9	4.8	27.5	41.4915	0.349379
FMTIM	R	20000	13.5	10	3.5	33.27	1.29	9.275	0	3.38402	0.329082
FMTL	R	20000	16.6	15	1.6	222.44	1.1	13.56	4	15.4379	0.613839
FMTM	R	20000	16.2	11.2	5	75.71	0.52	3.725	22.5	17.7148	0.0928571
FPD II	R	20000	62	52	10	15.12	4.18	1.875	21.25	7.09029	0.373214
FPD III	R	20000	67.5	21.2	46.3	68.4	14.46	1.075	47.5	40.5532	0.278849
FPD IV	R	20000	69.5	13	56.5	34.4	8.37	1.825	36.25	14.3405	0.132269
FPPD II	R	20000	34.9	6.4	28.5	4.7	7.7	1.05	23.75	3.8652	0.241228
FPPD III	R	20000	83	20.7	62.3	36.98	8.2	1.5	33	19.5057	0.117519
GIM	R	20000	33.6	19.6	14	54.07	1.7	12.325	0	4.1387	0.108418
GL	R	20000	34	24.4	9.6	191.43	3.93	6.925	33.75	21.6836	0.365513
GM	R	20000	42.9	28.7	14.2	340.2	7.38	7.8	37.5	32.6438	0.464034
IC	R	20000	22.4	22.4		206.2		18.875	0	10.3061	#DIV/0!
IFE	R	20000	11	7.1	3.9	18.11	0.6	7.1	0	2.40632	0.137363
IFI	R	20000	7.2	7.2		4.59		4.925	0	0.879226	#DIV/0!
ILFB	R	20000	27.9	21.9	6	262.65	0.69	16.25	5	15.1902	0.102679
ILPO	R	20000	24.5	23	1.5	357.2	1.3	16.215	0	20.7821	0.77381
ISF	R	20000	4.3	4.3		3.02		0.425	38.75	5.22808	#DIV/0!
ITCr	R	20000	16.6	12.4	4.2	31.3	0.68	1.625	27.5	16.1181	0.144558
OMII	R	20000	19.1	7	12.1	33.64	2.34	1.075	21.25	27.5145	0.172668
OMIP	R	20000	22	14.7	7.3	65.07	1.59	1.64	32	31.7433	0.194472
PIFLM	R	20000	18.2	14.2	4	60.41	1.06	10.8	5	5.25682	0.236607
POP	R	20000	5.3	5.3		10.47		4.575	0	2.15899	#DIV/0!
TC	R	20000	37	29.5	7.5	137.7	5.9	1.62	31	68.7351	0.702381
AMB	R	22000	14.5	14.5		47		7.98	0	5.55634	#DIV/0!
CFP	R	22000	14.2	14.2		79.2		5.62	29	11.6279	#DIV/0!
EDL	R	22000	71	20.5	50.5	31.57	9.1	4.5	27.5	5.87064	0.160891
FCLA	R	22000	6.9	6.9		9.9		4.175	0	2.23704	#DIV/0!
FCLP	R	22000	20.2	20.2		120		15.14	0	7.47738	#DIV/0!
FCM	R	22000	24	14.3	9.7	39.9	3.7	3.5	27	9.58252	0.340574
FDL	R	22000	70	24.5	45.5	52.89	10.03	2.25	26.25	19.8891	0.196821
FHL	R	22000	57.5	13	44.5	28.85	5.44	1.5	41.25	13.6419	0.109149
FL	R	22000	52.5	28	24.5	218.96	9.12	5.1	16	38.9341	0.332362
FMTIM	R	22000	7	7		18.86		11	0	1.6175	#DIV/0!
FMTL	R	22000	17.5	13.5	4	182.61	2.65	11.2	0	15.3816	0.591518
FMTM	R	22000	13.5	11	2.5	62.26	1.28	3.14	35	15.3228	0.457143
FPD II	R	22000	62	10	52	9.44	2.33	1.275	41.25	5.25147	0.0400069
FPD III	R	22000	67.5	22.5	45	67.56	19.63	1.975	30	27.9478	0.389484
FPD IV	R	22000	68.5	15	53.5	37.8	9.3	1.92	29	16.2444	0.155207
FPPD II	R	22000	67.5	6	61.5	5.24	1.93	1.825	13.75	2.63108	0.0280197
FPPD III	R	22000	71.5	19.5	52	32.57	5.85	1.325	40	17.7644	0.100446
GIM	R	22000	24.5	19.5	5	45.2	1.8	14.45	0	2.95097	0.321429
GL	R	22000	31.5	27.5	4	201.5	2.47	6.45	26.25	26.4326	0.551339
GM	R	22000	47.5	32.5	15	310	11.84	7.625	26.25	34.3991	0.704762
IC	R	22000	16	16		156.6		16.125	0	9.16191	#DIV/0!
IFE	R	22000	10.5	7.8	2.7	17.9	0.6	7.8	0	2.16497	0.198413
IFI	R	22000	7.9	7.9		4.5		6	0	0.707547	#DIV/0!
ILFB	R	22000	27	20	7	251.7	1	16.375	0	14.5009	0.127551
ILPO	R	22000	23.5	23.5		321.6	3	17.9375	0	16.9141	#DIV/0!
ISF	R	22000	3.5	3.5		1.5		3.025	0	0.4678	#DIV/0!
ITC	R	22000	11.8	11.8		104.9		3.52	35	23.0299	#DIV/0!
ITCr	R	22000	12.7	10.2	2.5	22.5	0.4	1.8	35	9.65981	0.142857
ITM	R	22000	7.5	7.5		2.2		2	26.25	0.930717	#DIV/0!
OMII	R	22000	21	15.3	5.7	35.5	1	2.55	28.75	11.5145	0.156642
OMIP	R	22000	19.9	14.3	5.6	57.1	1.5	2.9	27.5	16.4764	0.239158
PIFLM	R	22000	15.5	15.5		53.4		9.15	5	5.48477	#DIV/0!
POP	R	22000	5.5	5.5		8.38		4.45	0	1.77655	#DIV/0!
TC	R	22000	38.5	31	7.5	117.9	6.5	5.5	23	18.6154	0.77381
AMB	R	30000	10.5	10.5		38.4		8.4	0	4.31267	#DIV/0!
CFP	R	30000	17	17		100.9		4.875	16.25	18.7458	#DIV/0!
EDL	R	30000	66	18.5	47.5	50	18.3	5.3	25.2	8.05293	0.343985
FCLA	R	30000	9.5	9.5		27.2		4.25	0	6.03774	#DIV/0!
FCLP	R	30000	18.5	18.5		155		16	0	9.13915	#DIV/0!
FCM	R	30000	15.5	10	5.5	50.55	1.81	2.775	30	14.8827	0.293831
FDL	R	30000	72.5	14.5	58	58.31	20.16	1.275	36.25	34.7938	0.310345
FHL	R	30000	45	19.5	25.5	57.58	3.51	2.725	40	15.2705	0.122899
FL	R	30000	47.3	25.7	21.6	288.37	12.28	4.625	26.25	52.755	0.507606
FMTIM	R	30000	18	18		43.3		8.875	0	4.60271	#DIV/0!
FMTL	R	30000	17.5	17.5		256		11.025	0	21.9056	#DIV/0!
FMTM	R	30000	15.5	15.5		108.45		8.6	0	11.8967	#DIV/0!
FPD II	R	30000	59.8	9.5	50.3	21.6	4.57	2.025	25	9.12008	0.0811204
FPD III	R	30000	65.4	23.7	41.7	92.06	20.67	1.175	32.5	62.3385	0.442575
FPD IV	R	30000	64.3	11.9	52.4	47.12	11.8	1.825	27.5	21.6056	0.201063
FPPD II	R	30000	67.6	6.9	60.7	7.72	3.49	4.275	13.75	1.65481	0.0513356
FPPD III	R	30000	72.1	19.6	52.5	46.21	8.05	1.275	23.75	31.296	0.136905
GIM	R	30000	27.4	10	7.73	10	1.22	10.3	0	0.915919	0.140917
GL	R	30000	32.4	28.4	4	329.24	2.78	6.25	27.5	44.0814	0.620536
GM	R	30000	43.9	30.2	13.7	380	19.7	7.125	32.5	42.4348	1.28389
IC	R	30000	18	18		230.5		14.875	0	14.6187	#DIV/0!
IFE	R	30000	8	7	1	24.5	0.448	7	0	3.30189	0.4
IFI	R	30000	6	6		4.84		6	0	0.761006	#DIV/0!
ILFB	R	30000	24.5	20	4.5	372.6	1.38	19.25	0	18.2602	0.27381
ILPO	R	30000	22.75	20.75	4	465.3	3.22	11.35	0	38.6751	0.71875
ISF	R	30000	3.5	3.5		3.3		1.05	37.5	2.35226	#DIV/0!
ITC	R	30000	12.5	9	3.5	186.8	4.06	3.95	28.75	39.1145	1.03571
ITCr	R	30000	12	10	2	30.3	0.5	3.95	28.75	6.3446	0.223214
ITM	R	30000	10	6	4	7.3	0.56	1.025	31.25	5.744	0.125
OMII	R	30000	20.5	14.5	6	55.6	2	1.1	17	45.6008	0.297619
OMIP	R	30000	21	17.5	3.5	75.2	1.2	4.125	22.5	15.8892	0.306122
PIFLM	R	30000	19.5	17.5	2	74.55	0.7	3.5	12.5	19.618	0.3125
POP	R	30000	5.5	5.5	0	9.73		3.875	0	2.36884	#DIV/0!
TC	R	30000	31	23.6	7.4	155.27	6.78	6.85	33	17.9342	0.81805
AMB	R	36000	18	12.5	5.5	47	2	10.8333	0	4.09289	0.324675
AMB	R	36000	14.8	12.7	2.1	51	1	9.7	13.75	4.81798	0.42517
CFP	R	36000	26.4	21	5.4	162	2	7.875	0	19.407	0.330688
CFP	R	36000	24.5	20	4.5	167	1	10.48	28	13.2735	0.198413
EDL	R	36000	85	20	65	59	14	3.85	35	11.8427	0.192308
EDL	R	36000	83.3	27	56.3	58	13	2.25	27.5	21.5709	0.206166
FCLA	R	36000	8.5	8.5	0	30	0	7.625	0	3.71172	#DIV/0!
FCLA	R	36000	8.6	8.6	0	53		7.025	0	7.11744	#DIV/0!
FCLP	R	36000	26	26	0	256	0	21.4167	0	11.2767	#DIV/0!
FCLP	R	36000	28.2	28.2	0	297		25.96	0	10.7931	#DIV/0!
FCM	R	36000	9.3	9.3	0	53	0	5.36667	28.3333	8.20063	#DIV/0!
FCM	R	36000	13	13	0	81		4.55	0	16.7945	#DIV/0!
FDL	R	36000	86	23	63	87	18	4	36.25	16.5473	0.255102
FDL	R	36000	89.5	27	62.5	125	22	4.91667	19	22.6779	0.314286
FHL	R	36000	64.7	15.7	49	42	9	8.12	26	4.38579	0.163994
FHL	R	36000	70	19	51	49	9	1.15	25	36.4307	0.157563
FL	R	36000	63.7	35.7	28	478	12	5.94	23.5714	69.5821	0.382653
FL	R	36000	64	37.5	26.5	519	12	8.9	17.5	52.4676	0.404313
FMTIM	R	36000	21.5	17	8.5	70	2	5.36667	18.3333	11.6806	0.210084
FMTIM	R	36000	18.4	15.4	3	65	1	13.2667	15	4.46467	0.297619
FMTL	R	36000	22	17	5	68.7	12	8.44444	5.625	7.63807	2.14286
FMTL	R	36000	20.5	20.5	0	393	3.2	11	16.25	32.3585	#DIV/0!
FMTM	R	36000	17.5	12	5.5	76	3	5.06	27.5	12.5686	0.487013
FMTM	R	36000	14.4	13.6	0.8	102	1	4.46	24	19.7101	1.11607
FPD II	R	36000	75	10	65	20	6	5.025	36.25	3.02805	0.0824176
FPD II	R	36000	77.3	16.5	60.8	26	6	2.1	26.25	10.4756	0.0881109
FPD III	R	36000	84	28	56	136	25	5.73333	30	19.3801	0.398597
FPD III	R	36000	86	32.5	53.5	127	21	3.25	13	35.9202	0.350467
FPD IV	R	36000	75	14	61	45	12	3	41.25	10.6392	0.175644
FPD IV	R	36000	82.7	18.2	64.5	78	14	3.96	38	14.6429	0.193798
FPPD II	R	36000	75	11	64	11	2	9	5	1.14865	0.0279018
FPPD II	R	36000	83	9.6	73.4	7	2	7.75	0	0.8521	0.0243285
FPPD III	R	36000	90.5	25	65.5	76	10	2.52	43	20.8082	0.136314
FPPD III	R	36000	92	27	65	78	9.9	5.35714	13.3333	13.3656	0.135989
GIM	R	36000	0	0	0	83	0	9.66667	0	8.1002	#DIV/0!
GIM	R	36000	30	18	12	63	6	6.83333	26.6667	7.77251	0.446429
GL	R	36000	41	25	16	465	17	8.25	21.25	49.5579	0.948661
GL	R	36000	48	30	18	450	18	9.26	42	34.0698	0.892857
GM	R	36000	55.5	32	23.5	623	32	10.8	21	50.8054	1.21581
GM	R	36000	52	34	18	634	12	10.6	27	50.2757	0.595238
IC	R	36000	23	23	0	402	0	27	0	14.0461	#DIV/0!
IC	R	36000	23.5	23.5	0	456		18.7857	0	22.8998	#DIV/0!
IFE	R	36000	13	10	3	25	2	10	0	2.35849	0.595238
IFE	R	36000	10.5	7.9	2.6	34	1	7.9	0	4.06019	0.343407
IFI	R	36000	6	3.5	2.5	6	0	6.25	0	0.90566	0
IFI	R	36000	13.4	13.4	0	4.1		6.03333	0	0.641092	#DIV/0!
ILFB	R	36000	21.5	21.5	0	562	0	21.3	0	24.8915	#DIV/0!
ILFB	R	36000	33.4	24	9.4	547	4	18.84	0	27.3905	0.379939
ILPO	R	36000	43	30.5	12.5	705	17	16.5	0	40.3087	1.21429
ILPO	R	36000	40.2	28	12.2	785	6	17.725	0	41.7809	0.43911
ISF	R	36000	3.2	3.2	0	5		3.2	0	1.47406	#DIV/0!
ITC	R	36000	13.4	10.3	3.1	274	3	10.54	30	21.239	0.864055
ITC	R	36000	15.5	12	3.5	297	3.5	8	21.4286	32.6025	0.892857
ITCr	R	36000	28.5	13	5.5	50	1	2.425	37.5	15.4319	0.162338
ITCr	R	36000	15.5	11.5	4	51.5	1.8	1.95	35	20.4094	0.401786
ITM	R	36000	9.9	4.3	5.6	4	1	3.63333	0	1.0386	0.159439
ITM	R	36000	7.5	6	1.5	4	0.5	1.825	25	1.87399	0.297619
OMII	R	36000	0	0	7.5	60	2.5	3.33333	0	16.9811	0.297619
OMII	R	36000	25.5	16.5	9	64	3.8	3.1875	33.3333	15.8257	0.376984
OMIP	R	36000	27	17	10	90	2	2.5	26.6667	30.3498	0.178571
OMIP	R	36000	27	18	9	95	2.5	2.375	18.75	35.7332	0.248016
PIFLM	R	36000	19	19	0	107		4.51667	20	21.0013	#DIV/0!
PIFLM	R	36000	29	25	4	147	1.6	9.9	20	13.1632	0.357143
POP	R	36000	4.9	4.9	0	14		4.43333	0	2.97915	#DIV/0!
TC	R	36000	45.1	17.1	28	229	14	8.62	35	20.5299	0.446429
TC	R	36000	44.5	33.5	11	275	10	7.25	30	30.9898	0.811688
AMB	R	37000	15	11.8	3.2	49	1	7.44	28	5.48595	0.279018
CFP	R	37000	20.9	19.1	1.8	130	2	7.825	0	15.673	0.992063
EDL	R	37000	74.2	25.1	49.1	53	11	3.6	25	12.5876	0.200029
FCLA	R	37000	10.5	10.5	0	49	1	6.91667	0	6.68334	#DIV/0!
FCLP	R	37000	28	28	0	264	0	24.875	0	10.0123	#DIV/0!
FCM	R	37000	18.6	15	3.6	54	4	2.3	45.5	15.5247	0.992063
FDL	R	37000	81	27.5	53.5	132.5	14.5	4.1	32.5	25.7132	0.241989
FHL	R	37000	61.5	18.5	43	51	6.6	7.71429	28	5.50685	0.137043
FL	R	37000	57	30	27	448	15	5.875	41.6667	53.7402	0.496032
FMTIM	R	37000	20	14	6	49	4	12.125	0	3.81249	0.595238
FMTL	R	37000	21	19	2	372	5	15.6	0	22.4964	2.23214
FMTM	R	37000	18	16	2	194	8	6.14	30	25.8142	3.57143
FPD II	R	37000	72.5	17	55.5	20	3.7	3.98	17.5	4.52127	0.0595238
FPD III	R	37000	78	20	58	63	17	2.25	27	23.536	0.2617
FPD IV	R	37000	79	20	59	67.9	10.9	3.6	37	14.2105	0.164952
FPPD II	R	37000	89	13	76	5.2	7	2.62	27	1.66831	0.0822368
FPPD III	R	37000	91.5	30	61.5	75	10.1	5.41667	26	11.7404	0.146632
GIM	R	37000	22.5	22.5	0	47	4	17.75	0	2.49801	#DIV/0!
GL	R	37000	52.5	27.5	25	477	62	13.5	33.25	27.8762	2.21429
GM	R	37000	38	27	11	570	11	9.7	35	45.4111	0.892857
IC	R	37000	21	21	0	388	0	20.5	0	17.8555	#DIV/0!
IFE	R	37000	12.4	7.9	4.5	30	2	7.9	0	3.58252	0.396825
IFI	R	37000	5.9	3.6	2.3	2.4	0	5.2	0	0.435414	0
ILFB	R	37000	32	24	8	525	3	17.1	0	28.9639	0.334821
ILPO	R	37000	38	23	15	732	12	14.125	7.5	48.4714	0.714286
ITC	R	37000	15	11.1	3.9	285	3	10.32	0	26.0531	0.686813
ITCr	R	37000	14.7	13.1	1.6	38	2	2.12	40.5	12.8584	1.11607
ITM	R	37000	8.7	5.5	3.2	11	1	4.06667	0	2.55181	0.279018
OMII	R	37000	21.9	15.7	6.2	68	2	4.175	30.25	13.2733	0.288018
OMIP	R	37000	19	19	0	102	2	2.075	33.5	38.6708	#DIV/0!
PIFLM	R	37000	21.2	19.4	1.8	123	2	3.54	24.3333	29.8671	0.992063
POP	R	37000	8.3	8.3	0	13		5.025	19	2.30766	#DIV/0!
TC	R	37000	45	37	8	212	12.7	5.64286	33.3333	29.6122	1.41741
AMB	R	39000	16	16	0	77	0	6.9	21.25	9.81195	#DIV/0!
CFP	R	39000	21	21	0	165		8.275	37.5	14.9237	#DIV/0!
EDL	R	39000	92	27.5	64.5	61	19	4.76667	22.6667	11.1404	0.263012
FCLA	R	39000	8	8	0	43		7.4	0	5.4819	#DIV/0!
FCLP	R	39000	24.5	24.5	0	234		22.85	0	9.66104	#DIV/0!
FCM	R	39000	24.7	14.3	10.4	58	4	4.4	20	11.6857	0.343407
FDL	R	39000	93	27.5	65.5	110	25	3.64	37	22.7685	0.340785
FHL	R	39000	66.5	16.5	50	51	10	2.6	46.25	12.7965	0.178571
FL	R	39000	52	35.5	16.5	491	14.25	6.8	23.3333	62.5477	0.771104
FMTIM	R	39000	16.5	14	2.5	67	1	2.8	37.5	17.9093	0.357143
FMTL	R	39000	21	21	0	441		17.3333	0	24.0022	#DIV/0!
FMTM	R	39000	17	15	2	106	3	4.1	36.25	19.6694	1.33929
FPD II	R	39000	76	15.8	60.2	22	4	3.73333	20.3333	5.21288	0.0593261
FPD III	R	39000	88	31	57	137	30	2.75	20.8333	43.9255	0.469925
FPD IV	R	39000	85	21	64	78	14	2.56	42	21.361	0.195312
FPPD II	R	39000	87.2	9.2	78	8.4	3.4	6.43333	28.6667	1.08081	0.0389194
FPPD III	R	39000	98.5	30	68.5	90	11	4.2	29.5	17.5948	0.143379
GIM	R	39000	42.5	23.5	19	132	5	11.75	23.75	9.70061	0.234962
GL	R	39000	41.5	31.5	10	455	9	7	32.5	51.7174	0.803571
GM	R	39000	56.5	33.5	23	616	31	11.3333	19.2857	48.3989	1.20342
IC	R	39000	21.5	21.5	0	370		18.54	0	18.8272	#DIV/0!
IFE	R	39000	11.8	7.3	4.5	24	2	7.3	0	3.10158	0.396825
IFI	R	39000	10.4	10.4	0	7.4		4.5	0	1.55136	#DIV/0!
ILFB	R	39000	31	23	8	520	1.7	20.5	0	23.9301	0.189732
ILPO	R	39000	46	40.5	5.5	705	16	25	0	26.6038	2.5974
ISF	R	39000	4.4	4.4	0	4.5		4.4	0	0.964837	#DIV/0!
ITC	R	39000	16	12	4	301	3.85	8.5	20	31.3926	0.859375
ITCr	R	39000	12.5	11.5	1	30	0.5	2.125	38.3333	10.4473	0.446429
ITM	R	39000	5	4.5	0.5	6		1.625	0	3.48331	0
OMII	R	39000	24	15	9	67	5	3.5	38.75	14.0842	0.496032
OMIP	R	39000	26	18	8	132	6	2.7	31.25	39.4299	0.669643
PIFLM	R	39000	24	21	3	113	1.5	5.875	20	17.051	0.446429
POP	R	39000	5.5	5.5	0	15		1.83333	21.25	7.19389	#DIV/0!
TC	R	39000	45.2	37.2	8	277	4	6.57143	29.5714	34.5863	0.446429
AMB	R	41500	5.5	4.5	1	47	0	9.83333	0	4.50911	0
CFP	R	41500	25.8	25.8	0	169	1	6.66	25	21.6961	#DIV/0!
EDL	R	41500	76	23	53	58	13	5.1	21.25	9.99934	0.219003
FCLA	R	41500	9	5.5	3.5	37	1	4.9	0	7.1236	0.255102
FCLP	R	41500	28	28	0	263	0	20.5833	0	12.0541	#DIV/0!
FCM	R	41500	27	14.7	12.3	90	7	4.72	16	17.2916	0.50813
FDL	R	41500	92	28	64	109	24	5.3	36.25	15.6466	0.334821
FHL	R	41500	58	10	48	60	8.3	2.42	33	19.6165	0.15439
FL	R	41500	66	35	31	550	31	9.2	27	50.2516	0.892857
FMTIM	R	41500	22	19	3	74	2	6.425	31.25	9.28911	0.595238
FMTL	R	41500	22	22	0	466		16.8	0	26.168	#DIV/0!
FMTM	R	41500	16	14	2	133	2	5.28	32	20.1527	0.892857
FPD II	R	41500	74	12	62	34	4	6.35	16.25	4.84946	0.0576037
FPD III	R	41500	83	26	57	155	25	2.9	28.75	44.2071	0.391604
FPD IV	R	41500	84	18.5	65.5	69	14	3.53333	31.6667	15.6801	0.19084
FPPD II	R	41500	83	9	74	10	4	7	5	1.34258	0.0482625
FPPD III	R	41500	99.5	26	73.5	81	10	4.3	31	15.2327	0.121477
GIM	R	41500	29	20	9	58	3.3	14.05	5	3.87963	0.327381
GL	R	41500	46	27	19	477	19	7.375	35	49.9822	0.892857
GM	R	41500	55	44	16	705	25	12.125	26.25	49.1963	1.39509
IC	R	41500	24	24	0	410		22.4	0	17.2675	#DIV/0!
IFE	R	41500	10.6	8.3	2.3	30	1	8.3	0	3.40987	0.388199
ILFB	R	41500	33	29	4	626	3	25.5	0	23.1595	0.669643
ILPO	R	41500	43	35.5	7.5	779.3	8.3	15.3333	10.5	47.1442	0.988095
ISF	R	41500	7	7	0	6	0	1.1	55	2.95151	#DIV/0!
ITC	R	41500	16	13	3	333	2.7	10.3333	28.3333	26.7596	0.803571
ITCr	R	41500	15.1	12.2	2.9	45	2	2.925	36.25	11.7046	0.615764
ITM	R	41500	8	3	5	10	1	2.1	40	3.44135	0.178571
OMII	R	41500	22	17.5	4.5	91	1.3	5.25	31.25	13.9797	0.257937
OMIP	R	41500	24.2	17.7	6.5	137	3	3.44	28.75	32.9398	0.412088
PIFLM	R	41500	30	24.7	5.3	130	1	11.5	20	10.0213	0.168464
POP	R	41500	5.7	5.7	0	14		2.06667	30	5.53455	#DIV/0!
TC	R	41500	46	33.8	12.2	181.3	11.2	3.42	37	39.9406	0.819672
AMB	R	42000	13	13	0	54		9.5	0	5.36246	#DIV/0!
CFP	R	42000	27	27	0	172	0	5.23333	30.8333	26.6236	#DIV/0!
EDL	R	42000	82.5	22.5	60	61	14	4.16667	15	13.3407	0.208333
FCLA	R	42000	8	8	0	84	0	8	0	9.90566	#DIV/0!
FCLP	R	42000	26	26	0	270	0	23.25	0	10.9556	#DIV/0!
FCM	R	42000	26.5	15.5	11	74	5	13.6	0	5.13319	0.405844
FDL	R	42000	85	30	55	123	22	5.25	33.75	18.3775	0.357143
FHL	R	42000	64	17.5	46.5	61	9.85	3.6	32.5	13.4819	0.189132
FL	R	42000	66.5	35	31.5	557	13	8.02	20	61.5688	0.368481
FMTIM	R	42000	20	20	0	77		7.4	44	7.06134	#DIV/0!
FMTL	R	42000	0	0	6	451	2	8.76667	0	48.5329	0.297619
FMTM	R	42000	14	14	0	133		6.91667	0	18.1405	#DIV/0!
FPD II	R	42000	77	16	61	23	5	4.54	28	4.21989	0.073185
FPD III	R	42000	83	20	63	137	27	2.92	20.4	41.4861	0.382653
FPD IV	R	42000	85	21	64	83	14	3.26	24	21.9424	0.195312
FPPD II	R	42000	88	12.5	75.5	10	6.2	4.9	5	1.91797	0.0733207
FPPD III	R	42000	96.5	29	67.5	91	10.65	5.42857	19.1667	14.9377	0.140873
GIM	R	42000	0	0	0	116		14.5	27.5	6.69442	#DIV/0!
GL	R	42000	56	31	25	544	25	11.9	17.5	41.1307	0.892857
GM	R	42000	53	32	21	690	20	9.66667	23.3333	61.8317	0.85034
IC	R	42000	23.5	23.5	0	444	0	21.9	0	19.1264	#DIV/0!
IFE	R	42000	9.5	6	3.5	27	1.25	6	0	4.24528	0.318878
ILFB	R	42000	27.5	23.2	4.3	620	1.2	20.75	0	28.1882	0.249169
ILPO	R	42000	30.5	28.5	2	753	6	12.6	13	54.9342	2.67857
ISF	R	42000	4	4	0	5		3.75	0	1.25786	#DIV/0!
ITC	R	42000	16	13	3	336	5	10.9	30	25.1847	1.4881
ITCr	R	42000	9.5	9	0.5	44	2	3.05	27	12.1263	3.57143
ITM	R	42000	9.4	6.3	3.1	3.7	0.3	3.72	0	0.938324	0.0864055
OMII	R	42000	26.5	18	8.5	78	10	2.66667	36	22.3243	1.05042
OMIP	R	42000	26	17	9	141	3	4.63333	31.6667	24.4348	0.297619
PIFLM	R	42000	25.5	19	6.5	143	3	8.56	28.5	13.8502	0.412088
POP	R	42000	7.1	7.1	0	16		3.2	0	4.71698	#DIV/0!
TC	R	42000	49	38	11	298	7	6.78	30	35.9097	0.568182

## Sheet: SegmentMasses
BW (g)	TotMuscleMass (g)	Proximal Limb (g)	Distal Limb (g)
3600	592.65	374.46	218.19
3920	427.36	265.89	161.47
3950	450	296.98	153.02
4100	302.24	184.91	117.34
6000	460.25	286.82	173.43
17000	2677.9	1687.9	990.03
18000	2957.5	1783.2	1174.3
19300	2803.5	1735.8	1067.8
20000	2880	1670.2	1209.8
22000	2561	1514.9	1046.1
30000	3582.5	2177.5	1405
36000	5161.3	2977.1	2184.1
36000	6015.6	3654.3	2361.3
37000	5376.1	3353.9	2022.3
39000	5216.5	2993.7	2222.8
41500	6019.2	3713.4	2305.8
42000	6340.7	3739.8	2600.9
38583.3

## Sheet: BonesRawData
Body Mass (g)	Femur(mm)	TBT(mm)	TMT(mm)	PI pes (mm)
36000	219	407	380	61
3920	108	175	157	28
19300	195	348	324	53
4100	98	166	144	25
6000	108	176	161	26
3950	87	153	142	22
36000	232	393	383	59
42000	231	405	383	57
22000	189	344	326	51
3600	92	156	135	23
37000	207	393	355	50
17000	191	338	321	51
30000	200	340	299	46
18000	182	329	317	51
41500	220	415	384	59
20000	187	327	323	50
39000	210	420	396	53

## Sheet: US Group RawData
Muscle	BW(g)	MMass
ILPO	11130	190
FCRL P	11130	65
PIFL	11130	28
IIF	11130	49
IFE	11130	7
IFCR	11130	67
ITC	11130	2.56
ITCR	11130	15
OBTII	11130	43
OBTIP	11130	16
AMB	11130	12
ILFB	11130	163
FCLP	11130	78
ITBCR	11130	113
FCRM	11130	20
FTE prox	11130	119
FTE dist	11130	12
FTM	11130	21
FTI CD	11130	16
FTI M	11130	14
FTI CR	11130	4
TIB CR	11130	42
PIII	11130	26
PIV	11130	16
GL	11130	121
GM	11130	163
GIM	11130	13
GIC	11130	14
FIBL	11130	125
POP	11130	3.37
PPII	11130	1.22
PPIII	11130	11
PII	11130	6
PIII	11130	26
PIV	11130	16
FHL	11130	10
FDL	11130	23
EDL	11130	14
ILPO	740	4.83
FCRL P	740	2.09
PIFL	740	1.49
IIF	740	1.44
IFE	740	0.23
IFCR	740	2.57
ITC	740	0.07
ITCR	740	0.51
OBTII	740	0.97
OBTIP	740	0.4
AMB	740	0.4
ILFB	740	3.74
FCLP	740	2.52
ITBCR	740	3.42
FCRM	740	0.41
FTE prox	740	3.39
FTE dist	740	0.37
FTM	740	0.74
FTI CD	740	0.42
FTI M	740	0.58
FTI CR	740	0.51
TIB CR	740	1.35
PIII	740	0.77
PIV	740	1.05
GL	740	3.05
GM	740	5.12
GIM	740	0.44
GIC	740	0.33
FIBL	740	3.11
POP	740	0.1
PPII	740	0.05
PPIII	740	0.54
PII	740	0.26
PIII	740	0.77
PIV	740	1.05
FHL	740	0.34
FDL	740	0.77
EDL	740	0.43
ILPO	32100	792
FCRL P	32100	229
PIFL	32100	94
IIF	32100	193
IFE	32100	32
IFCR	32100	300
ITC	32100	7
ITCR	32100	44
OBTII	32100	54
OBTIP	32100	142
AMB	32100	59
ILFB	32100	533
FCLP	32100	263
ITBCR	32100	483
FCRM	32100	56
FTE prox	32100	383
FTE dist	32100	49
FTM	32100	51
FTI CD	32100	45
FTI M	32100	60
FTI CR	32100	21
TIB CR	32100	116
PIII	32100	90
PIV	32100	55
GL	32100	386
GM	32100	620
GIM	32100	37
GIC	32100	53
FIBL	32100	523
POP	32100	8
PPII	32100	5
PPIII	32100	51
PII	32100	16
PIII	32100	90
PIV	32100	55
FHL	32100	30
FDL	32100	104
EDL	32100	38
ILPO	1530	17.01
FCRL P	1530	5.67
PIFL	1530	3.42
IIF	1530	4.8
IFE	1530	0.72
IFCR	1530	7.17
ITC	1530	0.24
ITCR	1530	1.55
OBTII	1530	3.69
OBTIP	1530	1.57
AMB	1530	1.47
ILFB	1530	14.43
FCLP	1530	7.09
ITBCR	1530	9.57
FCRM	1530	0.88
FTE prox	1530	10.91
FTE dist	1530	1.47
FTM	1530	2.04
FTI CD	1530	1.25
FTI M	1530	1.67
FTI CR	1530	0.47
TIB CR	1530	3.8
PIII	1530	2.06
PIV	1530	1.38
GL	1530	9.61
GM	1530	12.32
GIM	1530	1.36
GIC	1530	1.17
FIBL	1530	9.82
POP	1530	0.22
PPII	1530	0.07
PPIII	1530	0.95
PII	1530	0.58
PIII	1530	2.06
PIV	1530	1.38
FHL	1530	0.73
FDL	1530	2.09
EDL	1530	1.23
ILPO	31500	613
FCRL P	31500	240
PIFL	31500	107
IIF	31500	149
IFE	31500	32
IFCR	31500	241
ITC	31500	5
ITCR	31500	39
OBTII	31500
OBTIP	31500
AMB	31500
ILFB	31500	439
FCLP	31500	271
ITBCR	31500	345
FCRM	31500	47
FTE prox	31500	305
FTE dist	31500	40
FTM	31500	46
FTI CD	31500	42
FTI M	31500	48
FTI CR	31500	14
TIB CR	31500	118
PIII	31500	90
PIV	31500	50
GL	31500	365
GM	31500	498
GIM	31500	34
GIC	31500	32
FIBL	31500	422
POP	31500	8
PPII	31500	4
PPIII	31500	59
PII	31500	13
PIII	31500	90
PIV	31500	50
FHL	31500	32
FDL	31500	70
EDL	31500	45
ILPO	940	8.81
FCRL P	940	3.4
PIFL	940	1.97
IIF	940	2.59
IFE	940	0.48
IFCR	940	3.59
ITC	940	0.09
ITCR	940	0.88
OBTII	940	0.87
OBTIP	940	1.76
AMB	940	0.55
ILFB	940	6.78
FCLP	940	3.97
ITBCR	940	5.12
FCRM	940	0.76
FTE prox	940	5.44
FTE dist	940	0.69
FTM	940	1.12
FTI CD	940	0.82
FTI M	940	0.83
FTI CR	940	0.24
TIB CR	940	2.03
PIII	940	1.66
PIV	940	2.05
GL	940	4.73
GM	940	7.07
GIM	940	0.64
GIC	940	0.69
FIBL	940	2.99
POP	940	0.17
PPII	940	0.06
PPIII	940
PII	940	0.34
PIII	940	1.66
PIV	940	2.05
FHL	940	0.56
FDL	940	1.6
EDL	940	0.68
ILPO	770	4.91
FCRL P	770	1.72
PIFL	770	1.5
IIF	770	1.3
IFE	770	0.22
IFCR	770	2.4
ITC	770	0.06
ITCR	770	0.59
OBTII	770	0.43
OBTIP	770	0.93
AMB	770	0.45
ILFB	770	4.16
FCLP	770
ITBCR	770	3.32
FCRM	770	0.42
FTE prox	770	3.73
FTE dist	770	0.57
FTM	770	0.85
FTI CD	770	0.35
FTI M	770	0.62
FTI CR	770	0.15
TIB CR	770	1.3
PIII	770	0.99
PIV	770	0.83
GL	770	3.3
GM	770	4.76
GIM	770	0.39
GIC	770	0.43
FIBL	770	2.67
POP	770	0.06
PPII	770	0.05
PPIII	770	0.59
PII	770	0.3
PIII	770	0.99
PIV	770	0.83
FHL	770	0.35
FDL	770	1.06
EDL	770	0.48
ILPO	15880
FCRL P	15880
PIFL	15880
IIF	15880
IFE	15880
IFCR	15880
ITC	15880
ITCR	15880
OBTII	15880
OBTIP	15880
AMB	15880
ILFB	15880
FCLP	15880
ITBCR	15880
FCRM	15880
FTE prox	15880	153
FTE dist	15880	18
FTM	15880	29
FTI CD	15880	21
FTI M	15880	22
FTI CR	15880	4
TIB CR	15880	48
PIII	15880	26
PIV	15880	19
GL	15880	170
GM	15880	243
GIM	15880	19
GIC	15880	13
FIBL	15880	186
POP	15880	3
PPII	15880	0.67
PPIII	15880	16
PII	15880	7
PIII	15880	26
PIV	15880	19
FHL	15880	13
FDL	15880	41
EDL	15880	22
ILPO	30000
FCRL P	30000
PIFL	30000
IIF	30000
IFE	30000
IFCR	30000
ITC	30000
ITCR	30000
OBTII	30000
OBTIP	30000
AMB	30000
ILFB	30000
FCLP	30000
ITBCR	30000
FCRM	30000
FTE prox	30000	254
FTE dist	30000	25
FTM	30000	44
FTI CD	30000
FTI M	30000	37
FTI CR	30000	9
TIB CR	30000	90
PIII	30000	42
PIV	30000	36
GL	30000	313
GM	30000	419
GIM	30000	31
GIC	30000	40
FIBL	30000	295
POP	30000	4
PPII	30000	2
PPIII	30000	34
PII	30000	11
PIII	30000	42
PIV	30000	36
FHL	30000	22
FDL	30000	56
EDL	30000	29
ILPO	36300	61.6
FCRL P	36300
PIFL	36300
IIF	36300
IFE	36300
IFCR	36300
ITC	36300
ITCR	36300
OBTII	36300
OBTIP	36300
AMB	36300
ILFB	36300
FCLP	36300
ITBCR	36300
FCRM	36300
FTE prox	36300	330
FTE dist	36300	37.4
FTM	36300	68.6
FTI CD	36300
FTI M	36300
FTI CR	36300	10.4
TIB CR	36300
PIII	36300	64.5
PIV	36300	48
GL	36300	430
GM	36300	591
GIM	36300	41.2
GIC	36300
FIBL	36300	438
POP	36300	9.7
PPII	36300	5.3
PPIII	36300	57.2
PII	36300	14.4
PIII	36300	64.5
PIV	36300	48
FHL	36300	32.6
FDL	36300	80.9
EDL	36300	36.8
ILPO	43100	765
FCRL P	43100
PIFL	43100	132
IIF	43100	170
IFE	43100	34
IFCR	43100
ITC	43100	283
ITCR	43100	45
OBTII	43100	72
OBTIP	43100	108
AMB	43100
ILFB	43100	604
FCLP	43100	294
ITBCR	43100	418
FCRM	43100	63
FTE prox	43100	359
FTE dist	43100	41
FTM	43100	70
FTI CD	43100
FTI M	43100	62
FTI CR	43100	16
TIB CR	43100	134
PIII	43100	73
PIV	43100	57
GL	43100	473
GM	43100	743
GIM	43100	56
GIC	43100	43
FIBL	43100	548
POP	43100	8
PPII	43100	5
PPIII	43100	60
PII	43100	16
PIII	43100	73
PIV	43100	57
FHL	43100	38
FDL	43100	99
EDL	43100	40
ILPO	41800
FCRL P	41800
PIFL	41800	111
IIF	41800	188
IFE	41800	28
IFCR	41800
ITC	41800	285
ITCR	41800	49
OBTII	41800	55
OBTIP	41800	138
AMB	41800	46
ILFB	41800	513
FCLP	41800	248
ITBCR	41800	368
FCRM	41800	63
FTE prox	41800	314
FTE dist	41800	42
FTM	41800	72
FTI CD	41800	33
FTI M	41800	46
FTI CR	41800	15
TIB CR	41800	120
PIII	41800	78
PIV	41800	50
GL	41800	418
GM	41800	584
GIM	41800	56
GIC	41800	40
FIBL	41800	457
POP	41800	7
PPII	41800	5
PPIII	41800	50
PII	41800	14
PIII	41800	78
PIV	41800	50
FHL	41800	30
FDL	41800	78
EDL	41800	35
ILPO	50900	880
FCRL P	50900
PIFL	50900	163
IIF	50900	183
IFE	50900	27
IFCR	50900	366
ITC	50900	10
ITCR	50900	64
OBTII	50900	75
OBTIP	50900	175
AMB	50900	72
ILFB	50900	692
FCLP	50900	380
ITBCR	50900	534
FCRM	50900	90
FTE prox	50900	461
FTE dist	50900	49
FTM	50900	77
FTI CD	50900	43
FTI M	50900	56
FTI CR	50900	16
TIB CR	50900	179
PIII	50900	99
PIV	50900	76
GL	50900	578
GM	50900	825
GIM	50900	67
GIC	50900	68
FIBL	50900	623
POP	50900	4
PPII	50900	7
PPIII	50900	73
PII	50900	21
PIII	50900	99
PIV	50900	76
FHL	50900	47
FDL	50900	106
EDL	50900	49
ILPO	51700	924
FCRL P	51700
PIFL	51700	183
IIF	51700	234
IFE	51700	39
IFCR	51700	374
ITC	51700	7
ITCR	51700	51
OBTII	51700	82
OBTIP	51700	186
AMB	51700	73
ILFB	51700	759
FCLP	51700	437
ITBCR	51700	586
FCRM	51700	79
FTE prox	51700	487
FTE dist	51700	60
FTM	51700	88
FTI CD	51700
FTI M	51700
FTI CR	51700
TIB CR	51700	184
PIII	51700	115
PIV	51700	78
GL	51700	611
GM	51700	812
GIM	51700	65
GIC	51700	60
FIBL	51700	721
POP	51700	6
PPII	51700	11
PPIII	51700	80
PII	51700	23
PIII	51700	115
PIV	51700	78
FHL	51700	53
FDL	51700	111
EDL	51700	54
ILPO	45900	366
FCRL P	45900
PIFL	45900
IIF	45900
IFE	45900
IFCR	45900
ITC	45900
ITCR	45900
OBTII	45900
OBTIP	45900
AMB	45900
ILFB	45900
FCLP	45900
ITBCR	45900
FCRM	45900
FTE prox	45900	413
FTE dist	45900	52
FTM	45900	74
FTI CD	45900
FTI M	45900
FTI CR	45900
TIB CR	45900	157
PIII	45900	86
PIV	45900	70
GL	45900	557
GM	45900	693
GIM	45900	85
GIC	45900	39
FIBL	45900	560
POP	45900	2
PPII	45900	10
PPIII	45900	72
PII	45900	21
PIII	45900	86
PIV	45900	70
FHL	45900	43
FDL	45900	99
EDL	45900	57
ILPO	7720
FCRL P	7720
PIFL	7720
IIF	7720
IFE	7720
IFCR	7720
ITC	7720
ITCR	7720
OBTII	7720
OBTIP	7720
AMB	7720
ILFB	7720
FCLP	7720
ITBCR	7720
FCRM	7720
FTE prox	7720	70
FTE dist	7720	6
FTM	7720	13
FTI CD	7720
FTI M	7720	10
FTI CR	7720	2
TIB CR	7720	21
PIII	7720	13
PIV	7720	10
GL	7720	70
GM	7720	81
GIM	7720	6
GIC	7720	5
FIBL	7720	65
POP	7720	1.3
PPII	7720	1.14
PPIII	7720	11
PII	7720	3.32
PIII	7720	13
PIV	7720	10
FHL	7720	5
FDL	7720	14
EDL	7720	7
ILPO	3070
FCRL P	3070
PIFL	3070
IIF	3070
IFE	3070
IFCR	3070
ITC	3070
ITCR	3070
OBTII	3070
OBTIP	3070
AMB	3070
ILFB	3070
FCLP	3070
ITBCR	3070
FCRM	3070
FTE prox	3070
FTE dist	3070	2.76
FTM	3070	3.1
FTI CD	3070	2.04
FTI M	3070	2.89
FTI CR	3070	0.92
TIB CR	3070	7.58
PIII	3070	4.59
PIV	3070	3.73
GL	3070	20.22
GM	3070	23.88
GIM	3070	2.57
GIC	3070	3.76
FIBL	3070	18.03
POP	3070	0.46
PPII	3070	0.62
PPIII	3070	2.5
PII	3070	0.85
PIII	3070	4.59
PIV	3070	3.73
FHL	3070	2.4
FDL	3070	5.26
EDL	3070	3.66
ILPO	1010
FCRL P	1010
PIFL	1010
IIF	1010
IFE	1010
IFCR	1010
ITC	1010
ITCR	1010
OBTII	1010
OBTIP	1010
AMB	1010
ILFB	1010
FCLP	1010
ITBCR	1010
FCRM	1010
FTE prox	1010	6.02
FTE dist	1010	0.88
FTM	1010	1.05
FTI CD	1010	0.55
FTI M	1010	0.88
FTI CR	1010	0.29
TIB CR	1010	2.6
PIII	1010	2.1
PIV	1010	2.22
GL	1010	6.72
GM	1010	8.08
GIM	1010	0.98
GIC	1010	1.06
FIBL	1010	5.77
POP	1010	0.24
PPII	1010	0.13
PPIII	1010	1.11
PII	1010	0.3
PIII	1010	2.1
PIV	1010	2.22
FHL	1010	0.63
FDL	1010	1.37
EDL	1010	0.75
ILPO	12040
FCRL P	12040
PIFL	12040
IIF	12040
IFE	12040
IFCR	12040
ITC	12040
ITCR	12040
OBTII	12040
OBTIP	12040
AMB	12040
ILFB	12040
FCLP	12040
ITBCR	12040
FCRM	12040
FTE prox	12040
FTE dist	12040	16
FTM	12040
FTI CD	12040
FTI M	12040
FTI CR	12040	3
TIB CR	12040	39
PIII	12040	23
PIV	12040	16
GL	12040	137
GM	12040	176
GIM	12040
GIC	12040
FIBL	12040	142
POP	12040	3.5
PPII	12040	1.62
PPIII	12040	12
PII	12040	5
PIII	12040	23
PIV	12040	16
FHL	12040
FDL	12040	24
EDL	12040	16
ILPO	770
FCRL P	770
PIFL	770
IIF	770
IFE	770
IFCR	770
ITC	770
ITCR	770
OBTII	770
OBTIP	770
AMB	770
ILFB	770
FCLP	770
ITBCR	770
FCRM	770
FTE prox	770	4.08
FTE dist	770	0.56
FTM	770
FTI CD	770	0.48
FTI M	770	0.6
FTI CR	770	0.21
TIB CR	770	1.88
PIII	770	1.41
PIV	770	1.62
GL	770	4.82
GM	770	5.69
GIM	770	0.9
GIC	770	0.59
FIBL	770	3.79
POP	770	0.05
PPII	770
PPIII	770	0.83
PII	770	0.43
PIII	770	1.41
PIV	770	1.62
FHL	770	0.52
FDL	770	1.1
EDL	770	0.77
ILPO	4740
FCRL P	4740
PIFL	4740
IIF	4740
IFE	4740
IFCR	4740
ITC	4740
ITCR	4740
OBTII	4740
OBTIP	4740
AMB	4740
ILFB	4740
FCLP	4740
ITBCR	4740
FCRM	4740
FTE prox	4740	34
FTE dist	4740	4
FTM	4740	6
FTI CD	4740	3
FTI M	4740	4
FTI CR	4740	1.43
TIB CR	4740	12
PIII	4740	8.37
PIV	4740	5.85
GL	4740	32
GM	4740	47
GIM	4740	4
GIC	4740	4.38
FIBL	4740	29
POP	4740	0.46
PPII	4740	0.38
PPIII	4740	4.1
PII	4740	2.07
PIII	4740	8.37
PIV	4740	5.85
FHL	4740	3.09
FDL	4740	9.16
EDL	4740	5.18
ILPO	4730
FCRL P	4730
PIFL	4730
IIF	4730
IFE	4730
IFCR	4730
ITC	4730
ITCR	4730
OBTII	4730
OBTIP	4730
AMB	4730
ILFB	4730
FCLP	4730
ITBCR	4730
FCRM	4730
FTE prox	4730	37
FTE dist	4730	4
FTM	4730	6
FTI CD	4730	3
FTI M	4730	5
FTI CR	4730	1.65
TIB CR	4730	11
PIII	4730	6.54
PIV	4730	5.22
GL	4730	39
GM	4730	54
GIM	4730	5
GIC	4730	4
FIBL	4730	36
POP	4730	1.3
PPII	4730	0.42
PPIII	4730	4
PII	4730	2.15
PIII	4730	6.54
PIV	4730	5.22
FHL	4730	3.02
FDL	4730	7.58
EDL	4730	3.48
ILPO	29400
FCRL P	29400
PIFL	29400
IIF	29400
IFE	29400
IFCR	29400
ITC	29400
ITCR	29400
OBTII	29400
OBTIP	29400
AMB	29400
ILFB	29400
FCLP	29400
ITBCR	29400
FCRM	29400
FTE prox	29400	203
FTE dist	29400	25
FTM	29400	45
FTI CD	29400	25
FTI M	29400	34
FTI CR	29400	9.8
TIB CR	29400	84
PIII	29400	47
PIV	29400	30
GL	29400	269
GM	29400	388
GIM	29400	22
GIC	29400	38
FIBL	29400	293
POP	29400	4.54
PPII	29400	3.35
PPIII	29400	30
PII	29400	10.87
PIII	29400	47
PIV	29400	30
FHL	29400	20
FDL	29400	49
EDL	29400	24
ILPO	15550
FCRL P	15550
PIFL	15550
IIF	15550
IFE	15550
IFCR	15550
ITC	15550
ITCR	15550
OBTII	15550
OBTIP	15550
AMB	15550
ILFB	15550
FCLP	15550
ITBCR	15550
FCRM	15550
FTE prox	15550	134
FTE dist	15550	17.2
FTM	15550	29.9
FTI CD	15550
FTI M	15550	20.1
FTI CR	15550	6.65
TIB CR	15550	51.8
PIII	15550	31.8
PIV	15550	23.8
GL	15550	171
GM	15550	238
GIM	15550	16.9
GIC	15550	20.4
FIBL	15550	185
POP	15550	3.17
PPII	15550	2.12
PPIII	15550	12.94
PII	15550	8.09
PIII	15550	31.8
PIV	15550	23.8
FHL	15550	13.8
FDL	15550	35.16
EDL	15550	19.6
ILPO	28900
FCRL P	28900
PIFL	28900
IIF	28900
IFE	28900
IFCR	28900
ITC	28900
ITCR	28900
OBTII	28900
OBTIP	28900
AMB	28900
ILFB	28900
FCLP	28900
ITBCR	28900
FCRM	28900
FTE prox	28900	289
FTE dist	28900	37
FTM	28900	53
FTI CD	28900	41
FTI M	28900	48
FTI CR	28900	15
TIB CR	28900	101
PIII	28900	63
PIV	28900	42
GL	28900	370
GM	28900	519
GIM	28900	44
GIC	28900	40
FIBL	28900	421
POP	28900	7.4
PPII	28900	4.68
PPIII	28900	54
PII	28900	11.87
PIII	28900	63
PIV	28900	42
FHL	28900	28
FDL	28900	71
EDL	28900	36
ILPO	2580
FCRL P	2580
PIFL	2580
IIF	2580
IFE	2580
IFCR	2580
ITC	2580
ITCR	2580
OBTII	2580
OBTIP	2580
AMB	2580
ILFB	2580
FCLP	2580
ITBCR	2580
FCRM	2580
FTE prox	2580	14.87
FTE dist	2580	1.87
FTM	2580	2.42
FTI CD	2580
FTI M	2580
FTI CR	2580	0.43
TIB CR	2580	4.86
PIII	2580	3.02
PIV	2580	2.64
GL	2580	12.85
GM	2580	14.79
GIM	2580	1.61
GIC	2580	1.82
FIBL	2580	12.75
POP	2580	0.34
PPII	2580	0.19
PPIII	2580	1.57
PII	2580	1.03
PIII	2580	3.02
PIV	2580	2.64
FHL	2580	1.38
FDL	2580	3.42
EDL	2580	1.79
ILPO	23550
FCRL P	23550
PIFL	23550
IIF	23550
IFE	23550
IFCR	23550
ITC	23550
ITCR	23550
OBTII	23550
OBTIP	23550
AMB	23550
ILFB	23550
FCLP	23550
ITBCR	23550
FCRM	23550
FTE prox	23550	197.5
FTE dist	23550	22.4
FTM	23550	36.5
FTI CD	23550	21.2
FTI M	23550	30
FTI CR	23550	7.7
TIB CR	23550	69
PIII	23550	36.5
PIV	23550	29.7
GL	23550	265.3
GM	23550	340.2
GIM	23550	26.9
GIC	23550	17.5
FIBL	23550	262.8
POP	23550	2.9
PPII	23550	1.89
PPIII	23550	28.3
PII	23550	8.1
PIII	23550	36.5
PIV	23550	29.7
FHL	23550	20.4
FDL	23550	48.2
EDL	23550	25.9
ILPO	6850
FCRL P	6850
PIFL	6850
IIF	6850
IFE	6850
IFCR	6850
ITC	6850
ITCR	6850
OBTII	6850
OBTIP	6850
AMB	6850
ILFB	6850
FCLP	6850
ITBCR	6850
FCRM	6850
FTE prox	6850	60.5
FTE dist	6850	6.6
FTM	6850	8.2
FTI CD	6850	5.2
FTI M	6850	7.6
FTI CR	6850	1.7
TIB CR	6850	21.3
PIII	6850	11.3
PIV	6850	7.7
GL	6850	64.1
GM	6850	87.1
GIM	6850	6.3
GIC	6850	6.3
FIBL	6850	56.2
POP	6850	1.1
PPII	6850	0.63
PPIII	6850	7
PII	6850	2.6
PIII	6850	11.3
PIV	6850	7.7
FHL	6850	4.6
FDL	6850	11.5
EDL	6850	6.6
ILPO	27380
FCRL P	27380
PIFL	27380
IIF	27380
IFE	27380
IFCR	27380
ITC	27380
ITCR	27380
OBTII	27380
OBTIP	27380
AMB	27380
ILFB	27380
FCLP	27380
ITBCR	27380
FCRM	27380
FTE prox	27380	221.6
FTE dist	27380	30.5
FTM	27380	42.8
FTI CD	27380	24.3
FTI M	27380	36
FTI CR	27380	9.8
TIB CR	27380	77.3
PIII	27380	46
PIV	27380	33.5
GL	27380	289
GM	27380	378.8
GIM	27380	41.8
GIC	27380	9.6
FIBL	27380	329.3
POP	27380	4.3
PPII	27380	3.1
PPIII	27380	27.7
PII	27380	9.9
PIII	27380	46
PIV	27380	33.5
FHL	27380	20.5
FDL	27380	49.1
EDL	27380	27.5

## Sheet: US Group regression
Dependant Variable	Outliers?	Slope	Lower 95% CI	Upper 95% CI	R Squared	P Value	N
POP.Muscle.Mass	1	1.0163	0.892348	1.15746	0.899731	5.42e-14	27
ILPO.Muscle.Mass	0	1.17848	0.935218	1.48502	0.890396	4.08e-06	12
FPDIV.Muscle.Mass	0	0.992435	0.936038	1.05223	0.978023	6.36e-24	29
OMII.Muscle.Mass	0	1.13059	0.945669	1.35168	0.951497	1.54e-06	10
FPDII.Muscle.Mass	0	1.02257	0.98066	1.06628	0.988761	7.4e-28	29
FPDIII.Muscle.Mass	0	1.08619	1.03361	1.14143	0.984201	7.36e-26	29
ITCr.Muscle.Mass	0	1.09276	1.03423	1.1546	0.994665	1.53e-11	11
FCLA.Muscle.Mass	0	1.10466	1.03643	1.17738	0.988663	4.93e-14	15
FMTM.Muscle.Mass	0	1.11647	1.05318	1.18357	0.986094	3.63e-18	20
EDL.Muscle.Mass	0	1.1058	1.05451	1.15959	0.985523	2.26e-26	29
PIFL.Muscle.Mass	0	1.10958	1.07896	1.14107	0.998622	3.46e-14	11
FPPDII.Muscle.Mass	0	1.18513	1.08373	1.29603	0.950635	1.64e-18	28
FMTIM.Muscle.Mass	0	1.12184	1.0845	1.16047	0.993243	1.18e-28	27
TC.Muscle.Mass	0	1.12422	1.09034	1.15915	0.994237	1.2e-30	28
FDL.Muscle.Mass	0	1.13116	1.09205	1.17167	0.992056	6.82e-30	29
FMTL.Muscle.Mass	0	1.13157	1.09385	1.1706	0.993222	1.23e-28	27
IFE.Muscle.Mass	0	1.19106	1.09719	1.29296	0.988122	5.64e-10	11
GIM.Muscle.Mass	0	1.15359	1.09777	1.21224	0.984852	3.45e-25	28
FHL.Muscle.Mass	0	1.1344	1.09845	1.17152	0.993617	4.54e-30	28
FPPDIII.Muscle.Mass	0	1.16326	1.10283	1.22701	0.982469	2.31e-24	28
CFP.Muscle.Mass	0	1.18351	1.10299	1.26991	0.991255	1.42e-10	11
IC.Muscle.Mass	0	1.20442	1.13855	1.27409	0.994432	1.86e-11	11
ITC.Muscle.Mass	0	1.19799	1.14145	1.25734	0.997071	3.96e-10	9
ILFB.Muscle.Mass	0	1.21232	1.14378	1.28497	0.994036	2.53e-11	11
FCLP.Muscle.Mass	0	1.20937	1.14378	1.27871	0.994527	1.72e-11	11
AMB.Muscle.Mass	0	1.28671	1.15673	1.43128	0.994094	1.31e-05	6
OMIP.Muscle.Mass	0	1.31195	1.1685	1.47301	0.979738	4.65e-08	10
GM.Muscle.Mass	0	1.2146	1.17902	1.25124	0.994331	7.17e-32	29
GL.Muscle.Mass	0	1.21536	1.17922	1.2526	0.994155	1.08e-31	29
ITM.Muscle.Mass	0	1.63471	1.17959	2.26544	0.806002	0.000176032	11
FCM.Muscle.Mass	0	1.25457	1.1804	1.33342	0.993459	3.84e-11	11
FL.Muscle.Mass	0	1.29112	1.24712	1.33667	0.992288	4.58e-30	29

## Sheet: NormalisedDataFig4
Muscle	MM/BM	SD	PCSA/BM^0.66	SDs	(FL/BM^0.33)10	SDs FL
ILPO	0.0193261	0.00143087	0.00518417	0.00135496	0.00365046	0.000761753
GM	0.0165889	0.000868861	0.00328305	0.00028182	0.00431074	0.000391183
ILFB	0.0146957	0.000819114	0.00633033	0.000780907	0.00221239	0.000246265
FL	0.0131512	0.00078017	0.00228352	0.000428645	0.00494958	0.000713761
GL	0.0124036	0.000660698	0.00292999	0.000806354	0.00358035	0.000796448
IC	0.0107097	0.00112172	0.0066043	0.000993662	0.00155391	0.000264231
FMTL	0.00935896	0.00367744	0.00398037	0.00122492	0.00224954	0.00106427
ITC	0.00788431	0.000245743	0.00299334	0.000349494	0.00230595	0.000384255
FCLP	0.00687703	0.000808457	0.00710998	0.000715223	0.000913668	7.23206e-05
TC	0.0063827	0.00119055	0.00196381	0.000561563	0.00268762	0.000475414
CFP	0.00417512	0.000394564	0.00237824	0.000579173	0.00156395	0.000363917
PIFLM	0.00330243	0.000429578	0.00223489	0.00094488	0.0014946	0.000645745
FPDIII	0.00325299	0.000781558	0.00101584	0.000396533	0.00291752	0.000828543
FMTM	0.00321285	0.00107028	0.00163138	0.00030471	0.00163774	0.000371826
OMIP	0.00298977	0.000401284	0.000901524	0.000266989	0.00285492	0.000537665
FDL	0.00297426	0.000463415	0.00138895	0.000200615	0.00172486	0.000381019
GIM	0.00214499	0.000827381	0.00380126	0.00116307	0.000547409	0.000238509
FPPDIII	0.00212183	0.000123754	0.00139032	0.000347593	0.00132405	0.000293544
OMII	0.00184169	0.000186302	0.00112964	0.000269375	0.0013585	0.000257063
FPDIV	0.00181511	0.000324567	0.00101881	0.000158553	0.00138055	0.000329445
FCM	0.00176657	0.000361782	0.00177256	0.00116307	0.00105784	0.00042832
FMTIM	0.00173479	0.000214372	0.00243272	0.00127536	0.000762809	0.000443388
EDL	0.00151608	0.000101502	0.00120938	0.000291266	0.00114332	0.000390787
AMB	0.00140652	0.00029297	0.0027724	0.000479537	0.000480223	0.000173833
FHL	0.001352	0.000105794	0.00131608	0.00092507	0.00130409	0.00103883
FCLA	0.00127067	0.000433282	0.00214264	0.000345079	0.00056088	0.000156525
ITCr	0.00112461	0.000247714	0.000744101	0.000125356	0.0011801	0.000353709
IFE	0.000738472	0.000121763	0.00242859	0.000437341	0.000292341	5.54656e-05
FPDII	0.000624886	0.000117344	0.00131093	0.000419391	0.000459049	0.000236872
POP	0.000368631	2.28846e-05	0.00101691	0.000449428	0.000378167	0.000158173
FPPDII	0.000222497	5.48406e-05	0.00193135	0.000712884	0.000112386	3.06533e-05
ITM	0.000167071	8.37784e-05	0.000868252	0.000338056	0.000187384	9.21611e-05
IFI	0.000133791	5.58522e-05	0.0017108	0.000269031	7.6272e-05	3.99262e-05
ISF	0.000129475	1.44222e-05	0.000948649	0.00043653	0.00013742	6.9866e-05
